# Supplementary material for: Affordability of Heathy, Equitable and More Sustainable Diets in Low-Income Households in Brisbane before and during the COVID-19 Pandemic
Source: MDPI journal article supplement (doi:10.3390/nu13124386), 2021-12-08
Supplement: s1 [file s1]

**Supplementary File S1. Details of the current and recommended diets: total energy of diets and goods comprising the diets, per reference household per fortnight**

Table S1: Total energy of diets and goods comprising the current and recommended diets, per reference household per fortnight

|                                                       | Current diet | Recommended diet |                                                          | Current diet | Recommended diet |                                                                | Current diet |
|-------------------------------------------------------|--------------|------------------|----------------------------------------------------------|--------------|------------------|----------------------------------------------------------------|--------------|
| Total energy of basket                                | 474,040 kJ   | 470,540 kJ       | Grain (cereal) foods                                     |              |                  | Discretionary choices*                                         |              |
|                                                       |              |                  | Wholegrain cereal biscuits, Weetbix™ (g)                 | 430          | 2216             | Beer, full strength (ml)                                       | 4661         |
|                                                       |              |                  | Wholemeal bread, pp (g)                                  | 1054         | 4272             | White wine, sparkling (ml)                                     | 863          |
|                                                       |              |                  | Rolled oats, whole (g)                                   | 870          | 6648             | Whiskey (ml)                                                   | 266          |
| Food (per fortnight)                                  |              |                  | White bread, pp (g)                                      | 3033         | 893              | Red wine (ml)                                                  | 1078         |
| Bottled water, still (ml)                             | 5296         | 5296             | Cornflakes (g)                                           | 680          | 670              | Butter (g)                                                     | 280          |
| Artificially sweetened beverages (ml)                 | 2391         | N/A              | White pasta, spaghetti (g)                               | 1326         | 2042             | Muffin, commercial (g)                                         | 1455         |
| Core five food groups                                 |              |                  | White rice, medium grain (g)                             | 1622         | 2042             | Cream-filled sweet biscuit, pp (g)                             | 496          |
| Fruit                                                 |              |                  | Dry water cracker biscuit (g)                            | 259          | 781              | Muesli bar, pp (g)                                             | 373          |
| Apples, red, loose (g)                                | 3497         | 5460             | Bread in sandwich (g)                                    | 120          | 120              | Mixed nuts, salted (g)                                         | 255          |
| Bananas, Cavendish, loose (g)                         | 899          | 5460             | Meats, poultry, fish, eggs, nuts, seeds and alternatives |              |                  | Pizza, commercial (g)                                          | 1182         |
| Oranges, loose (g)                                    | 1664         | 5460             | Beef mince, lean (g)                                     | 267          | 1168             | Savoury flavoured biscuits (g)                                 | 222          |
| Fruit salad, canned in juice (g)                      | 2046         | N/A              | Lamb loin chops (g)                                      | 257          | 1169             | Confectionary (g)                                              | 418          |
| Fruit juice (ml)                                      | 3026         | N/A              | Beef rump steak (g)                                      | 1056         | 1172             | Chocolate (g)                                                  | 441          |
| Vegetables                                            |              |                  | Tuna, canned in vegetable oil (g)                        | 1052         | 1841             | Sugar sweetened beverages, Coca Cola (ml)                      | 12012        |
| Potato, white, loose (g)                              | 1460         | 2320             | Whole barbecue chicken, cooked (g)                       | 1661         | 1471             | Meat pie, commercial (g)                                       | 1638         |
| Sweetcorn, canned, no added salt (g)                  | 206          | 1160             | Eggs (g)                                                 | 872          | 2208             | Frozen lasagne, pp (g)                                         | 4322         |
| Broccoli, loose (g)                                   | 422          | 1470             | Meat in tinned meat and vegetable casserole (g)          | 646          | 780              | Hamburger, commercial (g)                                      | 2413         |
| White cabbage, loose (g)                              | 235          | 1470             | Chicken in sandwich (g)                                  | 120          | 120              | Beef sausages (g)                                              | 1048         |
| Iceberg lettuce, whole (g)                            | 795          | 1470             | Peanuts, roasted, unsalted (g)                           | N/A          | 780              | Ham (g)                                                        | 189          |
| Carrot, loose (g)                                     | 753          | 2205             | Milk, yoghurt, cheese and alternatives                   |              |                  | Potato crisps, pp (g)                                          | 518          |
| Pumpkin (g)                                           | 240          | 2205             | Cheddar cheese, full fat (g)                             | 624          | 704              | Potato chips, hot, commercial (g)                              | 670          |
| Four bean mix, canned (g)                             | 74           | 1005             | Cheddar cheese, reduced fat (g)                          | 44           | 516              | Ice cream (g)                                                  | 1830         |
| Diced tomatoes, canned in tomato juice (g)            | 234          | 1638             | Milk, full fat (g)                                       | 5961         | 6438             | White sugar (g)                                                | 564          |
| Onion, brown, loose (g)                               | 84           | 1638             | Milk, reduced fat (g)                                    | 2929         | 12000            | Salad dressing (ml)                                            | 277          |
| Tomatoes, loose (g)                                   | 488          | 1638             | Yoghurt, full fat, plain (g)                             | 204          | 2576             | Tomato sauce (ml)                                              | 569          |
| Frozen mixed vegetables, pp (g)                       | 1184         | 1638             | Yoghurt, reduced fat, flavoured (vanilla) (g)            | 676          | 5100             | Chicken soup, canned (g)                                       | 1340         |
| Frozen peas, pp (g)                                   | 273          | 1638             | Flavoured milk (ml)                                      | 2416         | N/A              | Orange juice (ml)                                              | 3027         |
| Baked beans, canned (g)                               | 369          | 1005             | Unsaturated oils and spreads                             |              |                  | Fish fillet crumbed, pp (g)                                    | 302          |
| Salad vegetables in sandwich (g)                      | 120          | 120              | Canola margarine (g)                                     | 170          | 412              | Instant noodles, wheat based (g)                               | 381          |
| Vegetables in tinned meat and vegetable casserole (g) | 646          | N/A              | Sunflower oil (ml)                                       | 7            | 291              | * The recommended diet does not contain discretionary choices. |              |
|                                                       |              |                  | Olive oil (ml)                                           | 7            | 291              |                                                                |              |

pp = pre-packaged

## Supplementary File S2. Calculations of minimum wage and welfare-only disposable household incomes for a reference household per fortnight

Table S2A Calculations of minimum wage disposable household incomes for a reference household per fortnight

|                                                   | Reference household: Two parents with two children<br>Adult male (between 31 and 50 years), adult female (between 31 and 50 years), 14 years old boy, 8 years old girl                                                                                                                                                                                                                                                                                                                                                          |                      |                                                                                  |                      |
|---------------------------------------------------|---------------------------------------------------------------------------------------------------------------------------------------------------------------------------------------------------------------------------------------------------------------------------------------------------------------------------------------------------------------------------------------------------------------------------------------------------------------------------------------------------------------------------------|----------------------|----------------------------------------------------------------------------------|----------------------|
| <b>Assumptions</b>                                | <ul style="list-style-type: none"> <li>The adult male works on a permanent basis at national minimum wage for 38 hours a week (\$19.49/hr)</li> <li>The adult female works on a part-time basis at national minimum wage (\$19.49/hr) for 6 hours a week</li> <li>Both children attend school and are fully immunised</li> <li>None of the family are disabled</li> <li>The family has some emergency savings that earn negligible interest</li> <li>The family is privately renting a 3-bedroom house at \$376/week</li> </ul> |                      |                                                                                  |                      |
|                                                   | August 2019                                                                                                                                                                                                                                                                                                                                                                                                                                                                                                                     |                      | May 2020                                                                         |                      |
| Income                                            | Amount                                                                                                                                                                                                                                                                                                                                                                                                                                                                                                                          | Amount/<br>fortnight | Amount                                                                           | Amount/<br>fortnight |
| Paid employment - adult male                      | \$19.49/hr for 38h/week                                                                                                                                                                                                                                                                                                                                                                                                                                                                                                         | \$ 1,481.24          | \$19.49/hr for 38h/week                                                          | \$1,481.24           |
| Paid employment - adult female                    | \$19.49/hr for 6h/week                                                                                                                                                                                                                                                                                                                                                                                                                                                                                                          | \$ 233.88            | \$19.49/hr for 6h/week                                                           | \$ 233.88            |
| JobSeeker Allowance - adult male                  | N/A                                                                                                                                                                                                                                                                                                                                                                                                                                                                                                                             | \$ -                 | N/A                                                                              | \$ -                 |
| JobSeeker Allowance - adult female                | N/A                                                                                                                                                                                                                                                                                                                                                                                                                                                                                                                             | \$ -                 | \$324.05                                                                         | \$ 324.05            |
| Family Tax Benefit A fortnightly payment          | \$428.40/fortnight                                                                                                                                                                                                                                                                                                                                                                                                                                                                                                              | \$ 428.40            | \$428.40/fortnight                                                               | \$ 428.40            |
| Family Tax Benefit A annual supplement            | \$751.90/child/year                                                                                                                                                                                                                                                                                                                                                                                                                                                                                                             | \$ 57.84             | \$766.50/child/year                                                              | \$ 58.96             |
| Family Tax Benefit B fortnightly payment          | \$107.66/fortnight                                                                                                                                                                                                                                                                                                                                                                                                                                                                                                              | \$ 107.66            | \$74.06/fortnight                                                                | \$ 74.06             |
| Family Tax Benefit B annual supplement            | \$365.00/year/family                                                                                                                                                                                                                                                                                                                                                                                                                                                                                                            | \$ 14.04             | \$372.30/year/family                                                             | \$ 14.32             |
| Total Clean Energy Supplement (from all payments) | included in Family Tax Benefit estimator amounts                                                                                                                                                                                                                                                                                                                                                                                                                                                                                | \$ -                 | included in Family Tax Benefit estimator amounts +\$7.90                         | \$ 7.90              |
| Rent Assistance                                   | \$161.14                                                                                                                                                                                                                                                                                                                                                                                                                                                                                                                        | \$ 161.14            | \$164.08                                                                         | \$ 164.08            |
| First Economic Support payment                    | N/A                                                                                                                                                                                                                                                                                                                                                                                                                                                                                                                             | \$ -                 | \$750 paid in April 2020 (assumed spent over 6 fortnights)                       | \$ 125.00            |
| Coronavirus Supplement                            | N/A                                                                                                                                                                                                                                                                                                                                                                                                                                                                                                                             | \$ -                 | \$550/fortnight from April 27                                                    | \$ 550.00            |
| Income Tax Paid (fortnightly)                     | \$4063.40/year - low income tax offset (\$422.32) - low/med tax offset (\$368.42)                                                                                                                                                                                                                                                                                                                                                                                                                                               | \$ (125.87)          | Tax p.a. less low income tax offset & low-middle income tax offset (nil payable) | \$ -                 |
| <b>Fortnightly income total</b>                   |                                                                                                                                                                                                                                                                                                                                                                                                                                                                                                                                 | <b>\$ 2,358.33</b>   |                                                                                  | <b>\$3,336.02</b>    |

Source of data: Services Australia (Australian Government website): <https://www.servicesaustralia.gov.au/>

Table S2B Calculations of welfare-only disposable household incomes for a reference household per fortnight

|                                                   | Household 5: Two parents with two children<br>Adult male, adult female, 14yr boy, 8yr girl                                                                                                                                                                                                                                                                                         |                      |                                  |                      |
|---------------------------------------------------|------------------------------------------------------------------------------------------------------------------------------------------------------------------------------------------------------------------------------------------------------------------------------------------------------------------------------------------------------------------------------------|----------------------|----------------------------------|----------------------|
| <b>Assumptions</b>                                | <ul style="list-style-type: none"> <li>The adult male is unemployed</li> <li>The adult female is unemployed</li> <li>Both children attend school and are fully immunised</li> <li>None of the family are disabled</li> <li>The family has some emergency savings that earn negligible interest</li> <li>The family is privately renting a 3 bedroom house at \$376/week</li> </ul> |                      |                                  |                      |
|                                                   | Aug-19                                                                                                                                                                                                                                                                                                                                                                             | May-20               |                                  |                      |
| Income                                            | Amount                                                                                                                                                                                                                                                                                                                                                                             | Amount/<br>fortnight | Amount                           | Amount/<br>fortnight |
| Paid employment - adult male                      | N/A                                                                                                                                                                                                                                                                                                                                                                                |                      | N/A                              |                      |
| Paid employment - adult female                    | N/A                                                                                                                                                                                                                                                                                                                                                                                |                      | N/A                              |                      |
| Newstart Allowance - adult male                   | \$504.7/fortnight                                                                                                                                                                                                                                                                                                                                                                  | \$504.70             | \$510.80/fortnight               | \$510.80             |
| Newstart Allowance - adult female                 | \$504.7/fortnight                                                                                                                                                                                                                                                                                                                                                                  | \$504.70             | \$510.80/fortnight               | \$510.80             |
| Family Tax Benefit A fortnightly payment          | \$428.40/fortnight                                                                                                                                                                                                                                                                                                                                                                 | \$428.40             | \$428.40/fortnight               | \$428.40             |
| Family Tax Benefit A annual supplement            | \$751.90/child/year                                                                                                                                                                                                                                                                                                                                                                | \$57.84              | \$766.50/child/year              | \$58.96              |
| Family Tax Benefit B fortnightly payment          | \$52.08/fortnight                                                                                                                                                                                                                                                                                                                                                                  | \$52.08              | \$31.36/fortnight                | \$31.36              |
| Family Tax Benefit B annual supplement            | \$365.00/year/family                                                                                                                                                                                                                                                                                                                                                               | \$14.04              | \$372.30/year/family             | \$14.32              |
| Total Clean Energy Supplement (from all payments) | \$7.90 each                                                                                                                                                                                                                                                                                                                                                                        | \$15.80              | \$7.90 each                      | \$15.80              |
| Rent Assistance                                   | \$162.12                                                                                                                                                                                                                                                                                                                                                                           | \$162.12             | \$164.08                         | \$164.08             |
| Economic Support payment                          | N/A                                                                                                                                                                                                                                                                                                                                                                                |                      | 2x\$750 in 2020                  | \$250.00             |
| Coronavirus Supplement                            | N/A                                                                                                                                                                                                                                                                                                                                                                                |                      | 2x \$550/fortnight from 27 April | \$1,100.00           |
| Income Tax Paid (fortnightly)                     | Nil                                                                                                                                                                                                                                                                                                                                                                                |                      | Nil                              |                      |
| <b>Fortnightly income total</b>                   |                                                                                                                                                                                                                                                                                                                                                                                    | <b>\$1,739.68</b>    |                                  | <b>\$3,084.52</b>    |

Source of data: Services Australia (Australian Government website): <https://www.servicesaustralia.gov.au/>

### Supplementary File S3. Healthy Diets ASAP (Australian Standardised Affordability and Price) Survey Form

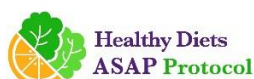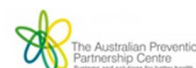

Date: \_\_\_\_\_

Store name \_\_\_\_\_

Store Location: \_\_\_\_\_

Collector: \_\_\_\_\_

#### Price Collection Protocol

1. Record the *usual price of an item*, i.e. do not collect the sale/special price unless it is the only price available (if so, note in comment column)
2. *Look for the specified brand and specified size for each food item, and record the price*
  - *If the specified brand is not available:* Choose the cheapest brand (non-generic) available in the specified size. Note this brand in the “Your brand” column
  - *If the specified size is not available:* Choose the nearest larger size in the specified brand. If a larger size is not available, choose the nearest smaller size. Note this size in the “Your size” column.
  - *If both the specified brand and specified size are not available:* Choose the cheapest in the nearest larger size of another brand (non-generic). If a larger size is not available, choose the nearest smaller size.
  - *If multiple brands are specified,* record the price of the cheapest one and note brand in the “Your brand” column
  - *If the item is only available in a generic form* (e.g. Home Brand, Coles, Woolworths Select, Black and Gold) choose the *most expensive generic* item in the specified size. If the specified size is not available, choose the nearest larger size. If a larger size is not available, choose the nearest smaller size. Note the generic name in the “Your brand” and the size in the “Your size” columns.
3. *Loose produce:* choose the usual cheapest price per kg of the variety not on special. If the only variety available is on special, record the special price and note in comments column.
4. *Peanuts:* choose the branded packet size closest to 250g. If packaged, roasted, unsalted peanuts are not available, record the price of the loose ‘bulk – scoop & weight’ roasted, unsalted peanuts per 100g.
5. *Check all data are recorded as above before leaving store.*

For more information contact Prof Amanda Lee, School of Public Health, The University of Queensland e: [Amanda.Lee@uq.edu.au](mailto:Amanda.Lee@uq.edu.au) m: 0412975197

| Food                                                                               | Specific brand                 | Your brand | Specific size | Your size | Your cost | Comments |
|------------------------------------------------------------------------------------|--------------------------------|------------|---------------|-----------|-----------|----------|
| <b>Fresh Fruit</b>                                                                 |                                |            |               |           |           |          |
| Apples, red, loose                                                                 |                                |            | per kg        |           |           |          |
| Bananas, cavendish, loose                                                          |                                |            | per kg        |           |           |          |
| Orange, loose                                                                      |                                |            | per kg        |           |           |          |
| <b>Fresh Vegetables</b>                                                            |                                |            |               |           |           |          |
| White potato, loose, brushed/washed                                                |                                |            | per kg        |           |           |          |
| Broccoli, loose                                                                    |                                |            | per kg        |           |           |          |
| Cabbage, white, ½ cabbage (1/2=1.5kg) (weigh if necessary)                         |                                |            | 1.5kg         |           |           |          |
| Lettuce, iceberg, whole (1=0.6kg)                                                  |                                |            | 0.6kg         |           |           |          |
| Carrot, loose                                                                      |                                |            | per kg        |           |           |          |
| Pumpkin, ½ pumpkin (1/2 av. Jap=1.5kg, 1/2 av. Butternut=1kg) (weigh if necessary) |                                |            | per kg        |           |           |          |
| Brown onion, loose                                                                 |                                |            | per kg        |           |           |          |
| Tomato, loose (not vine-ripened)                                                   |                                |            | per kg        |           |           |          |
| <b>Tinned Foods</b>                                                                |                                |            |               |           |           |          |
| Tinned sweet corn, kernels, no added salt                                          | Edgell                         |            | 420g          |           |           |          |
| Tinned 4 bean mix                                                                  | Edgell                         |            | 420g          |           |           |          |
| Tinned diced/chopped tomatoes, in tomato juice                                     | Ardmona                        |            | 400g          |           |           |          |
| Fruit salad, canned in juice                                                       | Goulburn Valley                |            | 700g          |           |           |          |
| Tinned steak & vegetables                                                          | Harvest                        |            | 425g          |           |           |          |
| Tinned baked beans, in tomato sauce                                                | Heinz                          |            | 420g          |           |           |          |
| Tinned chicken & vegetable soup, ready to eat                                      | Campbell's Country Ladle       |            | 505g          |           |           |          |
| Tuna, canned in vegetable oil, unflavoured (cheapest specified brand)              | John West, Greenseas or Sirena |            | 185g          |           |           |          |
| <b>Pantry Foods</b>                                                                |                                |            |               |           |           |          |
| Wholemeal Bread                                                                    | Tip Top Sunblest               |            | 650g          |           |           |          |
| White Bread                                                                        | Tip Top Sunblest               |            | 650g          |           |           |          |
| Muffin, commercial, uniced                                                         | Supermarket                    |            | \$/100g       |           |           |          |
| Rolled oats, whole, Traditional (not quick oats)                                   | Uncle Toby's                   |            | 1kg           |           |           |          |
| Cornflakes                                                                         | Kellogg's                      |            | 725g          |           |           |          |
| Weetbix                                                                            | Sanitarium                     |            | 375g          |           |           |          |
| Spaghetti (white)                                                                  | San Remo                       |            | 500g          |           |           |          |
| White rice, medium grain                                                           | SunRice                        |            | 1kg           |           |           |          |
| 2 Minute noodles, chicken (cheapest specified brand)                               | Maggi or Fantastic             |            | 70g           |           |           |          |
| White Sugar                                                                        | CSR                            |            | 2kg           |           |           |          |

Store name \_\_\_\_\_ Store Location: \_\_\_\_\_ Date: \_\_\_\_\_ Collector: \_\_\_\_\_

| Food                                                 | Specific brand                    | Your brand | Specific size | Your size | Your cost | Comments |
|------------------------------------------------------|-----------------------------------|------------|---------------|-----------|-----------|----------|
| Cream-filled biscuit                                 | Arnott's Monte-Carlo              |            | 250g          |           |           |          |
| Chewy Choc Chip Muesli Bar                           | Uncle Toby's                      |            | 6x30g (185g)  |           |           |          |
| Water Crackers, plain                                | Arnott's                          |            | 125g          |           |           |          |
| Savoury flavoured biscuits                           | Arnott's BBQ Shapes               |            | 175g          |           |           |          |
| Peanuts – roasted, unsalted peanuts                  | Cheapest branded                  |            | 250g          |           |           |          |
| Mixed nuts, (incl. peanut), salted                   | Nobby's                           |            | 375g          |           |           |          |
| Mint confectionary                                   | Allen's Minties                   |            | 150g          |           |           |          |
| Dairy milk chocolate, block                          | Cadbury                           |            | 200g          |           |           |          |
| Chips/crisps, original, salted                       | Smith's or Thins                  |            | 170g          |           |           |          |
| French Dressing, regular fat                         | Praise                            |            | 330mL         |           |           |          |
| Tomato sauce, regular (not ketchup)                  | Heinz Big Red or Masterfoods      |            | 500mL         |           |           |          |
| Sunflower oil                                        | Crisco                            |            | 750mL         |           |           |          |
| Olive oil, Traditional (not extra virgin)            | Moro                              |            | 1 Litre       |           |           |          |
| Meats                                                |                                   |            |               |           |           |          |
| Lean beef mince (not heart smart)                    | Pre-pack(not vacuum)              |            | per kg        |           |           |          |
| Lamb loin chops                                      | Pre-pack                          |            | per kg        |           |           |          |
| Beef rump steak                                      | Pre-pack                          |            | per kg        |           |           |          |
| Beef Sausages, pre-pack                              | Supermarket                       |            | per kg        |           |           |          |
| Refrigerated Items                                   |                                   |            |               |           |           |          |
| Cheddar cheese, regular fat                          | Coon                              |            | 250g          |           |           |          |
| Cheddar cheese, reduced fat                          | Coon                              |            | 250g          |           |           |          |
| Butter, original, salted (foil pack)                 | Western Star                      |            | 250g          |           |           |          |
| Canola Margarine, regular fat                        | MeadowLea                         |            | 500g          |           |           |          |
| Full cream milk, fresh                               | Paul's or Dairy Farmers           |            | 2L            |           |           |          |
| Reduced fat milk, fresh (not skim)                   | Paul's Trim or Dairy Farmers Lite |            | 2L            |           |           |          |
| Chocolate Milk, regular fat                          | Breaka, Big M, Oak or Paul's      |            | 600mL         |           |           |          |
| Plain Yoghurt, natural, Greek, regular fat (~4% fat) | Jalna                             |            | 1kg           |           |           |          |
| Yoghurt, vanilla/flavoured, reduced fat (~1% fat)    | Jalna                             |            | 1kg           |           |           |          |
| Leg Ham, pre-pack                                    | Don's                             |            | 250g          |           |           |          |
| Eggs, dozen, Free Range                              | Sunnyqueen Farms                  |            | 700g          |           |           |          |

| Food                                                               | Specific brand                                                    | CREATE CHANGE<br>Your brand | Specific size                           | Your size | Your cost | Comments |
|--------------------------------------------------------------------|-------------------------------------------------------------------|-----------------------------|-----------------------------------------|-----------|-----------|----------|
| <b>Drinks</b>                                                      |                                                                   |                             |                                         |           |           |          |
| Bottled water, still                                               | Mt Franklin                                                       |                             | 600mL                                   |           |           |          |
| Soft drink, Cola                                                   | Coca Cola                                                         |                             | 1.25L                                   |           |           |          |
| Diet soft drink, Cola                                              | Coca Cola                                                         |                             | 1.25L                                   |           |           |          |
| Orange Juice, Australian Grown (Fresh, chilled)                    | Berri                                                             |                             | 2L                                      |           |           |          |
| <b>Frozen Foods</b>                                                |                                                                   |                             |                                         |           |           |          |
| Frozen mixed vegetables (cheapest specified brand)                 | Heinz, Birdseye or McCain                                         |                             | 500g                                    |           |           |          |
| Frozen peas (cheapest specified brand)                             | Edgell, Birdseye or McCain                                        |                             | 500g                                    |           |           |          |
| Beef lasagne, frozen                                               | McCain                                                            |                             | 400g                                    |           |           |          |
| White crumbed fish fillet, frozen                                  | Birds Eye                                                         |                             | 425g                                    |           |           |          |
| Vanilla Ice cream, regular fat                                     | Nestle Peters Original                                            |                             | 2L                                      |           |           |          |
| <b>Other Items</b>                                                 |                                                                   |                             |                                         |           |           |          |
| Whole Barbeque Chicken, cooked - Large/ Family                     | Supermarket                                                       |                             | Per unit<br>~1.5kg                      |           |           |          |
| Pre-made Chicken & Salad Sandwich (wholemeal) (1 sandwich = ~220g) | Supermarket or, if unavailable, at closest garage/service station |                             | 2sl bread + filling (triangle pre-pack) |           |           |          |

Items from other stores:

| Food                                      | Store                        | Your store | Specific size    | Your size | Your cost | Comments |
|-------------------------------------------|------------------------------|------------|------------------|-----------|-----------|----------|
| Cooked hot potato chips                   | Independent Fish & Chip shop |            | ~110g<br>1 serve |           |           |          |
| Beef hamburger (Big Mac)                  | McDonald's                   |            | 1 burger         |           |           |          |
| Beef Pie, single serve, full pastry       | Independent Bakery           |            | ~250g<br>1 pie   |           |           |          |
| Supreme Pizza, thin base (1 pizza=0.55kg) | Pizza Hut                    |            | 1 large pizza    |           |           |          |

Liquor Store Name: \_\_\_\_\_

| Food                 | Specific brand                  | Your brand | Specific size | Your size | Your cost | Comments |
|----------------------|---------------------------------|------------|---------------|-----------|-----------|----------|
| Beer                 | VB                              |            | 6 x 375mL     |           |           |          |
| Sparkling white wine | Yellow                          |            | 750mL         |           |           |          |
| Whisky               | Johnny Walker Red Label         |            | 700mL         |           |           |          |
| Red wine             | Penfolds Koonungara Hill Shiraz |            | 750mL         |           |           |          |

## Supplementary File S4. Total diet and component costs for a reference household per fortnight in each included location in Greater Brisbane

Table S4A: Total diet and component costs for a reference household per fortnight in each included location in Greater Brisbane, SEIFA quintile 1

| Location                                                    | Comm1                                      |                 |                      |                  |                 |                      | Comm2                                      |                 |                      |                  |                 |                      | Comm3                                      |                 |                      |                  |                 |                      |
|-------------------------------------------------------------|--------------------------------------------|-----------------|----------------------|------------------|-----------------|----------------------|--------------------------------------------|-----------------|----------------------|------------------|-----------------|----------------------|--------------------------------------------|-----------------|----------------------|------------------|-----------------|----------------------|
| Area of socioeconomic disadvantage                          | Most disadvantaged area (SEIFA quintile 1) |                 |                      |                  |                 |                      | Most disadvantaged area (SEIFA quintile 1) |                 |                      |                  |                 |                      | Most disadvantaged area (SEIFA quintile 1) |                 |                      |                  |                 |                      |
|                                                             | Current diet                               |                 |                      | Recommended diet |                 |                      | Current diet                               |                 |                      | Recommended diet |                 |                      | Current diet                               |                 |                      | Recommended diet |                 |                      |
| Year                                                        | 2019                                       | 2020            | Change in cost (A\$) | 2019             | 2020            | Change in cost (A\$) | 2019                                       | 2020            | Change in cost (A\$) | 2019             | 2020            | Change in cost (A\$) | 2019                                       | 2020            | Change in cost (A\$) | 2019             | 2020            | Change in cost (A\$) |
| Food/food groups                                            | Mean cost (A\$)                            | Mean cost (A\$) |                      | Mean cost (A\$)  | Mean cost (A\$) |                      | Mean cost (A\$)                            | Mean cost (A\$) |                      | Mean cost (A\$)  | Mean cost (A\$) |                      | Mean cost (A\$)                            | Mean cost (A\$) |                      | Mean cost (A\$)  | Mean cost (A\$) |                      |
| Water, bottled                                              | 22.80                                      | 21.89           | -0.91                | 22.80            | 21.89           | -0.91                | 22.95                                      | 19.80           | -3.15                | 22.95            | 19.80           | -3.15                | 17.33                                      | 20.01           | +2.68                | 17.33            | 20.01           | +2.68                |
| Fruit                                                       | 54.53                                      | 57.54           | +3.01                | 68.81            | 83.62           | +14.81               | 49.75                                      | 52.94           | +3.19                | 60.67            | 76.83           | +16.16               | 56.23                                      | 59.65           | +3.42                | 83.23            | 90.80           | +7.57                |
| Vegetables (& legumes)                                      | 42.34                                      | 41.66           | -0.68                | 109.35           | 100.15          | -9.20                | 43.08                                      | 40.94           | -2.14                | 107.99           | 98.61           | -9.38                | 44.43                                      | 41.19           | -3.24                | 114.37           | 99.13           | -15.24               |
| Grain (cereal) foods                                        | 41.66                                      | 47.07           | +5.41                | 109.60           | 116.78          | +7.18                | 45.39                                      | 44.65           | -0.73                | 112.32           | 109.98          | -2.34                | 42.83                                      | 45.07           | +2.24                | 108.29           | 111.59          | +3.30                |
| Lean meats, poultry, fish, eggs, nuts, seeds & alternatives | 98.23                                      | 101.24          | +3.01                | 187.94           | 191.53          | +3.59                | 99.19                                      | 100.58          | +1.38                | 188.22           | 197.91          | +9.69                | 91.74                                      | 99.21           | +7.47                | 176.15           | 188.41          | +12.26               |
| Milk, yoghurt, cheese & alternatives                        | 49.40                                      | 54.44           | +5.04                | 110.85           | 122.39          | +11.54               | 48.40                                      | 55.19           | +6.80                | 111.00           | 117.73          | +6.74                | 47.81                                      | 55.77           | +7.96                | 110.34           | 123.84          | +13.50               |
| Unsaturated oils and spreads                                | 1.31                                       | 1.31            | 0.00                 | 8.44             | 8.41            | -0.03                | 1.25                                       | 1.26            | +0.02                | 8.07             | 8.61            | +0.54                | 1.25                                       | 1.27            | +0.03                | 8.08             | 9.09            | +1.00                |
| Artificially sweetened beverages                            | 5.80                                       | 6.56            | +0.76                | -                | -               | -                    | 4.86                                       | 6.02            | +1.16                | -                | -               | -                    | 6.23                                       | 6.02            | -0.20                | -                | -               | -                    |
| Sugar sweetened beverages                                   | 32.64                                      | 32.64           | 0.00                 | -                | -               | -                    | 29.31                                      | 30.27           | +0.96                | -                | -               | -                    | 32.96                                      | 30.27           | -2.69                | -                | -               | -                    |
| Takeaway foods                                              | 140.76                                     | 149.72          | +8.96                | -                | -               | -                    | 143.31                                     | 151.25          | +7.94                | -                | -               | -                    | 145.24                                     | 150.84          | +5.61                | -                | -               | -                    |
| Alcoholic beverages                                         | 81.71                                      | 89.42           | +7.70                | -                | -               | -                    | 99.79                                      | 99.15           | -0.63                | -                | -               | -                    | 99.79                                      | 99.15           | -0.63                | -                | -               | -                    |
| All other discretionary choices                             | 191.01                                     | 188.35          | -2.66                | -                | -               | -                    | 181.56                                     | 178.26          | -3.30                | -                | -               | -                    | 184.90                                     | 187.27          | +2.37                | -                | -               | -                    |
| <b>Total diet</b>                                           | <b>762.20</b>                              | <b>791.84</b>   | <b>+29.64</b>        | <b>617.79</b>    | <b>644.77</b>   | <b>+26.97</b>        | <b>768.82</b>                              | <b>780.32</b>   | <b>+11.50</b>        | <b>611.21</b>    | <b>629.47</b>   | <b>+18.26</b>        | <b>770.73</b>                              | <b>795.73</b>   | <b>+25.00</b>        | <b>617.79</b>    | <b>642.85</b>   | <b>+25.07</b>        |
| Healthy foods and drinks                                    | 316.07                                     | 331.71          | +15.64               | 617.79           | 644.77          | +26.97               | 314.85                                     | 321.38          | +6.53                | 611.21           | 629.47          | +18.26               | 307.85                                     | 328.19          | +20.35               | 617.79           | 642.85          | +25.07               |
| Discretionary foods and drinks                              | 446.13                                     | 460.13          | +14.00               | -                | -               | -                    | 453.96                                     | 458.94          | +4.97                | -                | -               | -                    | 462.88                                     | 467.54          | +4.65                | -                | -               | -                    |



Table S4B: Total diet and component costs for a reference household per fortnight in each included location in Greater Brisbane, SEIFA quintile 3

| Location                                                    | Comm4                                        |                 |               |                  |                 |               | Comm5                                        |                 |               |                  |                 |               | Comm6                                        |                 |               |                  |                 |               | Comm7                                        |                 |               |                  |                 |               |
|-------------------------------------------------------------|----------------------------------------------|-----------------|---------------|------------------|-----------------|---------------|----------------------------------------------|-----------------|---------------|------------------|-----------------|---------------|----------------------------------------------|-----------------|---------------|------------------|-----------------|---------------|----------------------------------------------|-----------------|---------------|------------------|-----------------|---------------|
| Area of socio-economic disadvantage                         | Median disadvantaged area (SEIFA quintile 3) |                 |               |                  |                 |               | Median disadvantaged area (SEIFA quintile 3) |                 |               |                  |                 |               | Median disadvantaged area (SEIFA quintile 3) |                 |               |                  |                 |               | Median disadvantaged area (SEIFA quintile 3) |                 |               |                  |                 |               |
|                                                             | Current diet                                 |                 |               | Recommended diet |                 |               | Current diet                                 |                 |               | Recommended diet |                 |               | Current diet                                 |                 |               | Recommended diet |                 |               | Current diet                                 |                 |               | Recommended diet |                 |               |
| Year                                                        | 2019                                         | 2020            | Change        | 2019             | 2020            | Change        | 2019                                         | 2020            | Change        | 2019             | 2020            | Change        | 2019                                         | 2020            | Change        | 2019             | 2020            | Change        | 2019                                         | 2020            | Change        | 2019             | 2020            | Change        |
| Food/food groups                                            | Mean cost (A\$)                              | Mean cost (A\$) | in cost (A\$) | Mean cost (A\$)  | Mean cost (A\$) | in cost (A\$) | Mean cost (A\$)                              | Mean cost (A\$) | in cost (A\$) | Mean cost (A\$)  | Mean cost (A\$) | in cost (A\$) | Mean cost (A\$)                              | Mean cost (A\$) | in cost (A\$) | Mean cost (A\$)  | Mean cost (A\$) | in cost (A\$) | Mean cost (A\$)                              | Mean cost (A\$) | in cost (A\$) | Mean cost (A\$)  | Mean cost (A\$) | in cost (A\$) |
| Water, bottled                                              | 20.83                                        | 19.86           | -0.97         | 20.83            | 19.86           | -0.97         | 20.15                                        | 18.39           | -1.76         | 20.15            | 18.39           | -1.76         | 21.19                                        | 19.62           | -1.57         | 21.19            | 19.62           | -1.57         | 18.98                                        | 16.89           | -2.09         | 18.98            | 16.89           | -2.09         |
| Fruit                                                       | 50.68                                        | 55.47           | +4.79         | 76.88            | 84.65           | +7.77         | 58.09                                        | 56.69           | -1.40         | 82.85            | 86.42           | 3.57          | 51.97                                        | 56.47           | +4.49         | 73.66            | 88.93           | +15.27        | 50.19                                        | 57.61           | +7.43         | 67.52            | 90.29           | +22.77        |
| Vegetables (& legumes)                                      | 40.63                                        | 40.89           | +0.26         | 102.39           | 96.37           | -6.02         | 45.52                                        | 40.18           | -5.34         | 115.21           | 94.45           | -20.75        | 41.48                                        | 37.13           | -4.36         | 104.45           | 86.88           | -17.57        | 44.66                                        | 40.64           | -4.02         | 113.42           | 97.62           | -15.80        |
| Grain (cereal) foods                                        | 42.44                                        | 45.48           | +3.04         | 107.24           | 111.12          | +3.88         | 43.50                                        | 43.71           | +0.22         | 109.68           | 110.15          | +0.47         | 43.77                                        | 46.04           | +2.27         | 108.64           | 112.42          | +3.78         | 44.26                                        | 46.25           | +2.00         | 110.55           | 116.31          | +5.76         |
| Lean meats, poultry, fish, eggs, nuts, seeds & alternatives | 99.19                                        | 99.63           | +0.44         | 192.30           | 195.88          | +3.58         | 99.78                                        | 97.54           | -2.24         | 193.55           | 190.23          | -3.33         | 91.58                                        | 94.90           | +3.32         | 172.28           | 181.29          | +9.02         | 96.76                                        | 104.38          | +7.62         | 181.94           | 199.65          | +17.70        |
| Milk, yoghurt, cheese & alternatives                        | 48.28                                        | 51.40           | +3.12         | 110.88           | 107.52          | -3.36         | 49.63                                        | 56.12           | +6.49         | 113.72           | 120.87          | +7.15         | 41.29                                        | 55.06           | +13.77        | 99.56            | 120.53          | +20.97        | 46.03                                        | 55.57           | +9.55         | 107.10           | 124.34          | +17.24        |
| Unsaturated oils and spreads                                | 1.23                                         | 1.27            | +0.05         | 8.55             | 9.05            | +0.49         | 1.26                                         | 1.27            | 0.00          | 8.81             | 8.83            | +0.02         | 1.26                                         | 1.24            | -0.01         | 8.57             | 7.80            | -0.77         | 1.19                                         | 1.26            | +0.07         | 7.89             | 8.58            | +0.69         |
| Artificially sweetened soft drink                           | 6.02                                         | 6.02            | 0.00          | -                | -               | -             | 5.59                                         | 6.02            | +0.43         | -                | -               | -             | 6.01                                         | 6.02            | +0.02         | -                | -               | -             | 4.94                                         | 6.02            | +1.08         | -                | -               | -             |
| Sugar sweetened beverages                                   | 29.79                                        | 30.27           | +0.48         | -                | -               | -             | 29.79                                        | 30.27           | +0.48         | -                | -               | -             | 33.54                                        | 30.27           | -3.27         | -                | -               | -             | 29.79                                        | 30.27           | +0.48         | -                | -               | -             |
| Takeaway foods                                              | 154.39                                       | 167.80          | +13.41        | -                | -               | -             | 146.51                                       | 151.63          | +5.12         | -                | -               | -             | 164.25                                       | 171.17          | +6.92         | -                | -               | -             | 145.36                                       | 156.09          | +10.73        | -                | -               | -             |
| Alcoholic beverages                                         | 99.79                                        | 99.15           | -0.63         | -                | -               | -             | 99.79                                        | 99.15           | -0.63         | -                | -               | -             | 95.30                                        | 98.12           | +2.82         | -                | -               | -             | 99.79                                        | 99.15           | -0.63         | -                | -               | -             |
| All other discretionary choices                             | 170.57                                       | 194.82          | +24.25        | -                | -               | -             | 193.48                                       | 184.98          | -8.50         | -                | -               | -             | 173.48                                       | 172.73          | -0.75         | -                | -               | -             | 174.62                                       | 176.57          | +1.94         | -                | -               | -             |
| <b>Total diet</b>                                           | <b>763.83</b>                                | <b>812.07</b>   | <b>+48.24</b> | <b>619.08</b>    | <b>624.44</b>   | <b>+5.37</b>  | <b>793.08</b>                                | <b>785.95</b>   | <b>-7.13</b>  | <b>643.97</b>    | <b>629.34</b>   | <b>-14.64</b> | <b>765.11</b>                                | <b>788.76</b>   | <b>+23.66</b> | <b>588.34</b>    | <b>617.48</b>   | <b>+29.14</b> | <b>756.56</b>                                | <b>790.71</b>   | <b>+34.15</b> | <b>607.39</b>    | <b>653.67</b>   | <b>+46.27</b> |
| Healthy foods and drinks                                    | 309.30                                       | 320.02          | +10.72        | 619.08           | 624.44          | +5.37         | 323.52                                       | 319.92          | -3.60         |                  |                 | -14.64        | 298.55                                       | 316.48          | +17.93        | 588.34           | 617.48          | +29.14        | 307.00                                       | 328.63          | +21.64        | 607.39           | 653.67          | +46.27        |
| Discretionary foods and drinks                              | 454.53                                       | 492.04          | +37.51        | -                | -               | -             | 469.57                                       | 466.03          | -3.53         | -                | -               | -             | 466.56                                       | 472.29          | +5.73         | -                | -               | -             | 449.56                                       | 462.08          | +12.52        | -                | -               | -             |

Table S4C: Total diet and component costs for a reference household per fortnight in each included location in Greater Brisbane, SEIFA quintile 5

| Location                                                    | Comm8                                       |                 |                      |                  |                 |                      | Comm9                                       |                 |                      |                  |                 |                      | Comm10                                      |                 |                      |                  |                 |                      |
|-------------------------------------------------------------|---------------------------------------------|-----------------|----------------------|------------------|-----------------|----------------------|---------------------------------------------|-----------------|----------------------|------------------|-----------------|----------------------|---------------------------------------------|-----------------|----------------------|------------------|-----------------|----------------------|
| Area socioeconomic disadvantage                             | Least disadvantaged area (SEIFA quintile 5) |                 |                      |                  |                 |                      | Least disadvantaged area (SEIFA quintile 5) |                 |                      |                  |                 |                      | Least disadvantaged area (SEIFA quintile 5) |                 |                      |                  |                 |                      |
|                                                             | Current diet                                |                 |                      | Recommended diet |                 |                      | Current diet                                |                 |                      | Recommended diet |                 |                      | Current diet                                |                 |                      | Recommended diet |                 |                      |
| Year                                                        | 2019                                        | 2020            |                      | 2019             | 2020            |                      | 2019                                        | 2020            |                      | 2019             | 2020            |                      | 2019                                        | 2020            |                      | 2019             | 2020            |                      |
| Food/food groups                                            | Mean cost (A\$)                             | Mean cost (A\$) | Change in cost (A\$) | Mean cost (A\$)  | Mean cost (A\$) | Change in cost (A\$) | Mean cost (A\$)                             | Mean cost (A\$) | Change in cost (A\$) | Mean cost (A\$)  | Mean cost (A\$) | Change in cost (A\$) | Mean cost (A\$)                             | Mean cost (A\$) | Change in cost (A\$) | Mean cost (A\$)  | Mean cost (A\$) | Change in cost (A\$) |
| Water, bottled                                              | 20.30                                       | 15.42           | -4.88                | 20.30            | 15.42           | -4.88                | 18.98                                       | 20.12           | +1.14                | 18.98            | 20.12           | +1.14                | 20.01                                       | 18.36           | -1.65                | 20.01            | 18.36           | -1.65                |
| Fruit                                                       | 49.80                                       | 57.78           | +7.98                | 67.60            | 88.93           | +21.33               | 62.32                                       | 58.38           | -3.95                | 83.17            | 90.44           | +7.27                | 50.28                                       | 61.87           | +11.60               | 63.72            | 102.20          | +38.49               |
| Vegetables (& legumes)                                      | 42.94                                       | 38.58           | -4.36                | 109.58           | 93.80           | -15.78               | 47.35                                       | 40.12           | -7.24                | 121.05           | 97.52           | -23.53               | 43.51                                       | 43.81           | +0.30                | 105.85           | 105.20          | -0.65                |
| Grain (cereal) foods                                        | 44.33                                       | 45.84           | +1.51                | 109.36           | 111.40          | +2.03                | 46.40                                       | 49.84           | +3.44                | 108.36           | 123.31          | +14.95               | 48.81                                       | 47.71           | -1.10                | 115.84           | 115.49          | -0.35                |
| Lean meats, poultry, fish, eggs, nuts, seeds & alternatives | 92.80                                       | 106.40          | +13.60               | 179.36           | 205.14          | +25.77               | 102.12                                      | 106.26          | +4.15                | 199.54           | 201.82          | +2.28                | 93.10                                       | 108.45          | +15.35               | 173.89           | 206.47          | +32.58               |
| Milk, yoghurt, cheese & alternatives                        | 48.88                                       | 55.53           | +6.65                | 110.12           | 121.53          | +11.41               | 52.52                                       | 56.33           | +3.81                | 133.51           | 129.48          | -4.03                | 47.10                                       | 54.76           | +7.65                | 118.86           | 120.54          | +1.69                |
| Unsaturated oils and spreads                                | 1.25                                        | 1.26            | +0.01                | 8.23             | 8.65            | +0.42                | 1.35                                        | 1.38            | +0.03                | 9.22             | 8.02            | -1.20                | 1.40                                        | 1.44            | +0.04                | 8.33             | 8.82            | +0.49                |
| Artificially sweetened beverages                            | 5.69                                        | 6.02            | +0.33                | -                | -               | -                    | 5.89                                        | 6.56            | +0.67                | -                | -               | -                    | 5.38                                        | 6.11            | +0.73                | -                | -               | -                    |
| Sugar sweetened beverages                                   | 30.27                                       | 30.27           | 0.00                 | -                | -               | -                    | 32.96                                       | 32.96           | 0.00                 | -                | -               | -                    | 30.40                                       | 30.72           | +0.32                | -                | -               | -                    |
| Takeaway foods                                              | 158.58                                      | 165.66          | +7.09                | -                | -               | -                    | 147.47                                      | 154.85          | +7.38                | -                | -               | -                    | 147.28                                      | 158.55          | +11.27               | -                | -               | -                    |
| Alcoholic beverages                                         | 99.79                                       | 98.74           | -1.05                | -                | -               | -                    | 88.11                                       | 98.12           | +10.01               | -                | -               | -                    | 99.79                                       | 99.15           | -0.63                | -                | -               | -                    |
| All other discretionary choices                             | 170.81                                      | 176.36          | +5.55                | -                | -               | -                    | 199.13                                      | 187.25          | -11.88               | -                | -               | -                    | 184.62                                      | 187.23          | +2.61                | -                | -               | -                    |
| <b>Total diet</b>                                           | <b>765.44</b>                               | <b>797.88</b>   | <b>+32.44</b>        | <b>604.55</b>    | <b>644.85</b>   | <b>+40.30</b>        | <b>804.61</b>                               | <b>812.16</b>   | <b>+7.55</b>         | <b>673.82</b>    | <b>670.72</b>   | <b>-3.11</b>         | <b>771.67</b>                               | <b>818.16</b>   | <b>+46.49</b>        | <b>606.48</b>    | <b>677.09</b>   | <b>+70.60</b>        |
| Healthy foods and drinks                                    | 305.99                                      | 326.84          | +20.85               | 604.55           | 644.85          | +40.30               | 336.93                                      | 338.98          | +2.04                | 673.82           | 670.72          | -3.11                | 309.58                                      | 342.51          | +32.93               | 606.48           | 677.09          | +70.60               |
| Discretionary foods and drinks                              | 459.45                                      | 471.04          | +11.59               | -                | -               | -                    | 467.67                                      | 473.18          | +5.51                | -                | -               | -                    | 462.09                                      | 475.65          | +13.56               | -                | -               | -                    |

# Supplementary File S5. Total diet and component costs for a reference household per fortnight in Greater Brisbane by area of socioeconomic disadvantage

Table S5A: Total current diet and component costs for a reference household per fortnight in Greater Brisbane by area of socioeconomic disadvantage

| Location                                                    | Most disadvantaged areas (SEIFA quintile 1), n=9 locations |                              |                       |                              |                      |                    | Median disadvantaged areas (SEIFA quintile 3), n=12 locations |                              |                        |                              |                      |                    | Least disadvantaged areas (SEIFA quintile 5), n=9 locations |                              |                       |                              |                      |                    |
|-------------------------------------------------------------|------------------------------------------------------------|------------------------------|-----------------------|------------------------------|----------------------|--------------------|---------------------------------------------------------------|------------------------------|------------------------|------------------------------|----------------------|--------------------|-------------------------------------------------------------|------------------------------|-----------------------|------------------------------|----------------------|--------------------|
| Year                                                        | 2019                                                       |                              | 2020                  |                              | Change in cost (A\$) | Change in cost (%) | 2019                                                          |                              | 2020                   |                              | Change in cost (A\$) | Change in cost (%) | 2019                                                        |                              | 2020                  |                              | Change in cost (A\$) | Change in cost (%) |
| Food/food groups                                            | Mean cost (A\$) ±SD                                        | Proportion of total cost (%) | Mean cost (A\$) ±SD   | Proportion of total cost (%) |                      |                    | Mean cost (A\$) ±SD                                           | Proportion of total cost (%) | Mean cost (A\$) ±SD    | Proportion of total cost (%) |                      |                    | Mean cost (A\$) ±SD                                         | Proportion of total cost (%) | Mean cost (A\$) ±SD   | Proportion of total cost (%) |                      |                    |
| Water, bottled                                              | \$21.03 ±2.62                                              | 2.74%                        | \$20.57 ±0.94         | 2.61%                        | -0.46                | -2.19%             | \$20.29 ±0.84                                                 | 2.64%                        | \$18.69 ±1.18          | 2.35%                        | -1.60                | -7.88%             | \$19.76 ±0.57                                               | 2.53%                        | \$17.97 ±1.94         | 2.22%                        | -1.80                | -9.09%             |
| Fruit                                                       | \$53.50 ±2.75                                              | 6.97%                        | \$56.71 ±2.8          | 7.18%                        | +3.21                | +5.99%             | \$52.73 ±3.16                                                 | 6.85%                        | \$56.56 ±0.76          | 7.12%                        | +3.83                | +7.26%             | \$54.13 ±5.79                                               | 6.94%                        | \$59.34 ±1.80         | 7.33%                        | +5.21                | +9.62%             |
| Vegetables (& legumes)                                      | \$43.28 ±0.87                                              | 5.64%                        | \$41.26 ±0.3          | 5.23%                        | -2.02                | -4.67%             | \$43.07 ±2.06                                                 | 5.60%                        | \$39.71 ±1.51          | 5.00%                        | -3.36                | -7.81%             | \$44.6 ±1.96                                                | 5.71%                        | \$40.84 ±2.19         | 5.05%                        | -3.76                | -8.44%             |
| Grain (cereal) foods                                        | \$43.29 ±1.56                                              | 5.64%                        | \$45.60 ±1.06         | 5.78%                        | +2.30                | +5.32%             | \$43.49 ±0.67                                                 | 5.65%                        | \$45.37 ±1.00          | 5.71%                        | +1.88                | +4.33%             | \$46.51 ±1.83                                               | 5.96%                        | \$47.79 ±1.63         | 5.90%                        | +1.28                | +2.76%             |
| Lean meats, poultry, fish, eggs, nuts, seeds & alternatives | \$96.39 ±3.31                                              | 12.56%                       | \$100.34 ±0.84        | 12.71%                       | +3.95                | +4.10%             | \$96.82 ±3.24                                                 | 12.58%                       | \$99.11 ±3.47          | 12.48%                       | +2.28                | +2.36%             | \$96.01 ±4.32                                               | 12.30%                       | \$107.04 ±1.00        | 13.22%                       | +11.03               | +11.49%            |
| Milk, yoghurt, cheese & alternatives                        | \$48.53 ±0.65                                              | 6.33%                        | \$55.13 ±0.54         | 6.99%                        | +6.60                | +13.60%            | \$46.31 ±3.17                                                 | 6.02%                        | \$54.54 ±1.85          | 6.87%                        | +8.23                | +17.78%            | \$49.50 ±2.26                                               | 6.34%                        | \$55.54 ±0.64         | 6.86%                        | +6.04                | +12.19%            |
| Unsaturated oils and spreads                                | \$1.27 ±0.03                                               | 0.17%                        | \$1.28 ±0.02          | 0.16%                        | +0.02                | +1.23%             | \$1.23 ±0.03                                                  | 0.16%                        | \$1.26 ±0.01           | 0.16%                        | +0.03                | +2.24%             | \$1.33 ±0.06                                                | 0.17%                        | \$1.36 ±0.07          | 0.17%                        | +0.03                | +1.97%             |
| Artificially sweetened beverages                            | \$5.63 ±0.57                                               | 0.73%                        | \$6.20 ±0.25          | 0.79%                        | +0.57                | +10.17%            | \$5.64 ±0.44                                                  | 0.73%                        | \$6.02 ±0.00           | 0.76%                        | +0.38                | +6.77%             | \$5.65 ±0.21                                                | 0.72%                        | \$6.23 ±0.23          | 0.77%                        | +0.58                | +10.22%            |
| Sugar sweetened beverages                                   | \$31.64 ±1.65                                              | 4.12%                        | \$31.06 ±1.12         | 3.94%                        | -0.58                | -1.82%             | \$30.73 ±1.62                                                 | 3.99%                        | \$30.27 ±0.00          | 3.81%                        | -0.46                | -1.48%             | \$31.21 ±1.24                                               | 4.00%                        | \$31.32 ±1.18         | 3.87%                        | +0.11                | +0.34%             |
| Takeaway foods                                              | \$143.10 ±1.83                                             | 18.65%                       | \$150.61 ±0.65        | 19.08%                       | +7.50                | +5.24%             | \$152.63 ±7.56                                                | 19.83%                       | \$161.67 ±8.06         | 20.35%                       | +9.05                | +5.93%             | \$151.11 ±5.28                                              | 19.36%                       | \$159.69 ±4.49        | 19.73%                       | +8.58                | +5.68%             |
| Alcoholic beverages                                         | \$93.76 ±8.52                                              | 12.22%                       | \$95.91 ±4.59         | 12.15%                       | +2.15                | +2.29%             | \$98.66 ±1.94                                                 | 12.82%                       | \$98.89 ±0.45          | 12.45%                       | +0.23                | +0.23%             | \$95.90 ±5.5                                                | 12.29%                       | \$98.67 ±0.43         | 12.19%                       | +2.78                | +2.89%             |
| All other discretionary choices                             | \$185.82 ±1.65                                             | 24.22%                       | \$184.63 ±4.53        | 23.39%                       | -1.20                | -0.64%             | \$178.04 ±1.62                                                | 23.13%                       | \$182.27 ±8.49         | 22.95%                       | +4.24                | +2.38%             | \$184.86 ±1.24                                              | 23.68%                       | \$183.62 ±5.13        | 22.69%                       | -1.24                | -0.67%             |
| <b>Total diet</b>                                           | <b>\$767.25 ±3.66</b>                                      | <b>100.00%</b>               | <b>\$789.30 ±6.55</b> | <b>100.00%</b>               | <b>+22.05</b>        | <b>+2.87%</b>      | <b>\$769.64 ±13.92</b>                                        | <b>100.00%</b>               | <b>\$794.37 ±10.35</b> | <b>100.00%</b>               | <b>+24.73</b>        | <b>+3.21%</b>      | <b>\$780.57 ±17.19</b>                                      | <b>100.00%</b>               | <b>\$809.40 ±8.51</b> | <b>100.00%</b>               | <b>+28.83</b>        | <b>+3.69%</b>      |
| Healthy foods and drinks                                    | \$312.92 ±3.62                                             | 40.79%                       | \$327.09 ±4.29        | 41.44%                       | +14.17               | +4.53%             | \$309.59 ±8.98                                                | 40.22%                       | \$321.26 ±4.49         | 40.44%                       | +11.67               | +3.77%             | \$317.5 ±13.82                                              | 40.68%                       | \$336.11 ±6.71        | 41.53%                       | +18.61               | +5.86%             |
| Discretionary foods and drinks                              | \$454.33 ±6.85                                             | 59.21%                       | \$462.20 ±3.8         | 58.56%                       | +7.88                | +1.73%             | \$460.06 ±8.27                                                | 59.78%                       | \$473.11 ±11.52        | 59.56%                       | +13.06               | +2.84%             | \$463.07 ±3.43                                              | 59.32%                       | \$473.29 ±1.88        | 58.47%                       | +10.22               | +2.21%             |

Table S5B: Total recommended diet and component costs for a reference household per fortnight in Greater Brisbane by area of socioeconomic disadvantage

| Location                                                    | Most disadvantaged areas (SEIFA quintile 1), n=9 locations |                              |                       |                              |                      |                    | Median disadvantaged areas (SEIFA quintile 3), n=12 locations |                              |                        |                              |                      |                    | Least disadvantaged areas (SEIFA quintile 5), n=9 locations |                              |                        |                              |                      |                    |
|-------------------------------------------------------------|------------------------------------------------------------|------------------------------|-----------------------|------------------------------|----------------------|--------------------|---------------------------------------------------------------|------------------------------|------------------------|------------------------------|----------------------|--------------------|-------------------------------------------------------------|------------------------------|------------------------|------------------------------|----------------------|--------------------|
| Year                                                        | 2019                                                       |                              | 2020                  |                              | Change in cost (A\$) | Change in cost (%) | 2019                                                          |                              | 2020                   |                              | Change in cost (A\$) | Change in cost (%) | 2019                                                        |                              | 2020                   |                              | Change in cost (A\$) | Change in cost (%) |
| Food/food groups                                            | Mean cost (A\$) ±SD                                        | Proportion of total cost (%) | Mean cost (A\$) ±SD   | Proportion of total cost (%) |                      |                    | Mean cost (A\$) ±SD                                           | Proportion of total cost (%) | Mean cost (A\$) ±SD    | Proportion of total cost (%) |                      |                    | Mean cost (A\$) ±SD                                         | Proportion of total cost (%) | Mean cost (A\$) ±SD    | Proportion of total cost (%) |                      |                    |
| Water, bottled                                              | \$21.03 ±2.62                                              | 3.42%                        | \$20.57 ±0.94         | 3.22%                        | -0.46                | -2.19%             | \$20.29 ±0.84                                                 | 3.30%                        | \$18.69 ±1.18          | 2.96%                        | -1.60                | -7.88%             | \$19.76 ±0.57                                               | 3.15%                        | \$17.97 ±1.94          | 2.70%                        | -1.80                | -9.09%             |
| Fruit                                                       | \$70.90 ±9.33                                              | 11.52%                       | \$83.75 ±5.70         | 13.11%                       | +12.85               | +18.12%            | \$75.23 ±5.54                                                 | 12.24%                       | \$87.57 ±2.19          | 13.87%                       | +12.35               | +16.41%            | \$71.49 ±8.41                                               | 11.38%                       | \$93.86 ±5.94          | 14.13%                       | +22.36               | +31.28%            |
| Vegetables (& legumes)                                      | \$110.57 ±2.74                                             | 17.96%                       | \$99.29 ±0.64         | 15.54%                       | -11.27               | -10.20%            | \$108.87 ±5.53                                                | 17.71%                       | \$93.83 ±4.17          | 14.86%                       | -15.04               | -13.81%            | \$112.16 ±6.47                                              | 17.85%                       | \$98.84 ±4.75          | 14.88%                       | -13.32               | -11.87%            |
| Grain (cereal) foods                                        | \$110.07 ±1.68                                             | 17.88%                       | \$112.78 ±2.90        | 17.65%                       | +2.71                | +2.47%             | \$109.03 ±1.24                                                | 17.74%                       | \$112.50 ±2.35         | 17.82%                       | +3.47                | +3.18%             | \$111.19 ±3.31                                              | 17.70%                       | \$116.74 ±4.94         | 17.57%                       | +5.55                | +4.99%             |
| Lean meats, poultry, fish, eggs, nuts, seeds & alternatives | \$184.10 ±5.63                                             | 29.91%                       | \$192.62 ±3.95        | 30.14%                       | +8.51                | +4.62%             | \$185.02 ±8.63                                                | 30.10%                       | \$191.76 ±6.91         | 30.38%                       | +6.74                | +3.64%             | \$184.26 ±11.03                                             | 29.33%                       | \$204.47 ±1.96         | 30.78%                       | +20.21               | +10.97%            |
| Milk, yoghurt, cheese & alternatives                        | \$110.73 ±0.28                                             | 17.99%                       | \$121.32 ±2.61        | 18.99%                       | +10.59               | +9.57%             | \$107.82 ±5.31                                                | 17.54%                       | \$118.31 ±6.41         | 18.74%                       | +10.50               | +9.74%             | \$120.83 ±9.65                                              | 19.23%                       | \$123.85 ±4.00         | 18.65%                       | +3.02                | +2.50%             |
| Unsaturated oils and spreads                                | \$8.20 ±0.17                                               | 1.33%                        | \$8.70 ±0.28          | 1.36%                        | +0.50                | +6.14%             | \$8.46 ±0.35                                                  | 1.38%                        | \$8.57 ±0.47           | 1.36%                        | +0.11                | +1.31%             | \$8.59 ±0.45                                                | 1.37%                        | \$8.50 ±0.34           | 1.28%                        | -0.10                | -1.12%             |
| <b>Total diet</b>                                           | <b>\$615.60 ±3.10</b>                                      | <b>100.00%</b>               | <b>\$639.03 ±6.80</b> | <b>100.00%</b>               | <b>+23.43</b>        | <b>+3.81%</b>      | <b>\$614.70 ±20.15</b>                                        | <b>100.00%</b>               | <b>\$631.23 ±13.62</b> | <b>100.00%</b>               | <b>+16.54</b>        | <b>+2.69%</b>      | <b>\$628.29 ±32.21</b>                                      | <b>100.00%</b>               | <b>\$664.22 ±13.94</b> | <b>100.00%</b>               | <b>+35.93</b>        | <b>+5.72%</b>      |

**Supplementary File S6. Differences between the mean total cost of the current and recommended diets by area socioeconomic disadvantage and within area of socioeconomic disadvantage, t-tests**

Table S6A: The differences between the mean total cost of the current and recommended diets by area of socioeconomic disadvantage, p-values of the t-tests

| Area of socioeconomic disadvantage                             | 2019         |                  | 2020         |                  |
|----------------------------------------------------------------|--------------|------------------|--------------|------------------|
|                                                                | Current diet | Recommended diet | Current diet | Recommended diet |
| Most vs median disadvantaged (SEIFA quintile 1 vs quintile 3)  | 0.85         | 0.93             | 0.69         | 0.44             |
| Most vs least disadvantaged (SEIFA quintile 1 vs quintile 5)   | 0.55         | 0.60             | 0.32         | 0.23             |
| Median vs least disadvantaged (SEIFA quintile 3 vs quintile 5) | 0.62         | 0.59             | 0.41         | 0.13             |

Table S6B: The differences between the mean total cost of the current and recommended diets within area of socioeconomic disadvantage between 2019 and 2020, p-values of the t-tests (\* indicates  $p < 0.05$ , \*\* indicates  $p < 0.01$ )

| Area of socioeconomic disadvantage            | 2019 vs 2020 |                  |
|-----------------------------------------------|--------------|------------------|
|                                               | Current diet | Recommended diet |
| Most disadvantaged (SEIFA quintile 1, n=9)    | 0.15         | <0.01**          |
| Median disadvantaged (SEIFA quintile 3, n=12) | <0.03*       | 0.15             |
| Least disadvantaged (SEIFA quintile 5, n=9)   | 0.28         | 0.24             |

**Supplementary File S7. Affordability of current and recommended diets for a reference household with minimum wage and welfare-only disposable household income in Greater Brisbane by area of socioeconomic disadvantage**

Table S7A: Affordability of current and recommended diets for a reference household with minimum wage disposable household income in Greater Brisbane by area of socioeconomic disadvantage

| Area of socioeconomic disadvantage            | Affordability of current diet (% of income) |      |                 |                 | Affordability of recommended diet (% of income) |      |                 |                 |
|-----------------------------------------------|---------------------------------------------|------|-----------------|-----------------|-------------------------------------------------|------|-----------------|-----------------|
|                                               | 2019                                        | 2020 | Absolute change | Relative change | 2019                                            | 2020 | Absolute change | Relative change |
| Most disadvantaged areas (SEIFA quintile 1)   | 33%                                         | 24%  | -9%             | -27%            | 26%                                             | 19%  | -7%             | -27%            |
| Median disadvantaged areas (SEIFA quintile 3) | 33%                                         | 24%  | -9%             | -27%            | 26%                                             | 19%  | -7%             | -27%            |
| Least disadvantaged areas (SEIFA quintile 5)  | 33%                                         | 24%  | -9%             | -27%            | 27%                                             | 20%  | -7%             | -25%            |

Table S7B: Affordability of current and recommended diets for a reference household with welfare-only disposable household income in Greater Brisbane by area of socioeconomic disadvantage

| Area of socioeconomic disadvantage            | Affordability of current diet (% of income) |      |                 |                 | Affordability of recommended diet (% of income) |      |                 |                 |
|-----------------------------------------------|---------------------------------------------|------|-----------------|-----------------|-------------------------------------------------|------|-----------------|-----------------|
|                                               | 2019                                        | 2020 | Absolute change | Relative change | 2019                                            | 2020 | Absolute change | Relative change |
| Most disadvantaged areas (SEIFA quintile 1)   | 44%                                         | 26%  | -19%            | -42%            | 35%                                             | 21%  | -15%            | -41%            |
| Median disadvantaged areas (SEIFA quintile 3) | 44%                                         | 26%  | -18%            | -42%            | 35%                                             | 20%  | -15%            | -42%            |
| Least disadvantaged areas (SEIFA quintile 5)  | 45%                                         | 26%  | -19%            | -42%            | 36%                                             | 22%  | -15%            | -40%            |
